1 **Comment on "Magnetosensitive neurons mediate geomagnetic orientation in**  
2 **Caenorhabditis elegans"**

3

4 Lukas Landler<sup>1</sup>, Simon Nimpf<sup>1</sup>, Tobias Hochstoecker<sup>1</sup>, Gregory Charles Nordmann<sup>1</sup>,

5 Artemis Papadaki-Anastasopoulou<sup>1</sup>, David Anthony Keays<sup>1\*</sup>

6

7 <sup>1</sup>Research Institute of Molecular Pathology, Campus Vienna Biocenter 1, Vienna,

8 1030, Austria

9 \*Corresponding author, Ph 43(1) 79730 3530. Fax 43 1 798 71 53. E-mail:

10 keays@imp.ac.at

11

12

13 **Abstract**

14 A diverse array of species on the planet employ the Earth's magnetic field as a  
15 navigational aid. As the majority of these animals are migratory, their utility to  
16 interrogate the molecular and cellular basis of the magnetic sense is limited. Vidal-  
17 Gadea and colleagues recently argued that the worm *C. elegans* possesses a  
18 magnetic sense that guides their vertical movement in soil. In making this claim they  
19 relied on three different behavioural assays that involved magnetic stimuli. Here, we  
20 set out to replicate their results employing blinded protocols and double wrapped  
21 coils that control for heat generation. We find no evidence supporting the existence  
22 of a magnetic sense in *C. elegans*. We further show that the Vidal-Gadea hypothesis  
23 is problematic as the adoption of a correction angle and a fixed trajectory relative to  
24 the Earth's magnetic inclination does not necessarily result in vertical movement.

25

26

27

28

29

## 30 **Introduction**

31 The ability to sense the Earth's magnetic field is a widespread sensory faculty in the  
32 animal kingdom (Wiltschko and Wiltschko, 2012). Magnetic sensation has been  
33 shown in migratory birds (Zapka et al., 2009), mole rats (Nemec et al., 2001),  
34 pigeons (Keeton, 1971; Lefeldt et al., 2014; Mora et al., 2004) and turtles (Lohmann  
35 et al., 2004). While behavioral evidence supporting the existence of a magnetic  
36 sense is strong, the underlying sensory mechanisms and neuronal circuitry that  
37 transduce and integrate magnetic information are largely unknown. A major  
38 impediment to progress in the field is the lack of genetic and molecular tools in  
39 magnetosensitive species. One such model system could be the nematode  
40 *Caenorhabditis elegans*, which has proved to be a powerful tool to explore a wide  
41 variety of senses. It has been claimed by Vidal-Gadea et al. (2015) that *C. elegans*  
42 possess a magnetic sense which can easily be exploited for mechanistic  
43 investigation (see also Bainbridge et al., 2016). They argue that *C. elegans* possess a  
44 magnetic sense that is employed for vertical orientation, worms adopting a correction  
45 angle relative to the inclination of the Earth's magnetic field. This conclusion was  
46 based on results from three assays which they developed: (1) a "vertical burrowing  
47 assay"; (2) a "horizontal plate assay"; and (3) a "magnetotaxis assay". Here, we set  
48 out to replicate the aforementioned behavioral assays, adopting several critical  
49 controls that were absent in the original study.

50

## 51 **Results**

52

### 53 **Benzaldehyde Control Experiment**

54 We established a positive control for our experiments employing the odorant  
55 benzaldehyde. It has been shown that if worms are placed in the center of a petri-  
56 dish and given the choice between 1% benzaldehyde and 100% ethanol they are  
57 attracted to the benzaldehyde. Conversely, if worms are pre-exposed to 100%

58 benzaldehyde their preference is disrupted (Nuttley et al., 2001). Employing blinded  
59 protocols we found that worms preferred 1% benzaldehyde (n=11, p<0.005,  
60 Wilcoxon signed rank test), which was lost when pre-exposed to 100% benzaldehyde  
61 (Figure 1A-B). These results show that we are able to replicate published *C. elegans*  
62 chemotaxis experiments in our laboratory.

63

#### 64 **Infrastructure and double wrapped coils**

65 To perform the magnetic experiments described by Vidal-Gadea and colleagues we  
66 built the necessary infrastructure to insure that our experiments were performed in a  
67 clean magnetic environment. This consists of 6 double-wrapped Helmholtz coils,  
68 within a mu-metal shielded room that is surrounded by a faraday cage (Figure 2A-C).  
69 Radio frequency contamination within this room is very low, with intensities below  
70 0.1nT between 0.1 to 10 MHz (see Figure 2A-B). This infrastructure is critical for  
71 applying magnetic stimuli in a controlled fashion (Engels et al., 2014).

72

#### 73 **Vertical Burrowing Assay**

74 In the first magnetic assay described by Vidal-Gadea, starved animals were injected  
75 into agar-filled plastic pipettes (Figure 3A). Worms were allowed to migrate overnight,  
76 and the number on each end of the tube were counted. In the absence of an external  
77 field the authors reported that animals preferentially migrated downwards, however,  
78 when exposed to an inverted Earth strength magnetic field worms migrated upwards.  
79 This preference was reversed in the case of fed animals. We repeated these  
80 experiments, but observed no effect of inverting the magnetic field on the burrowing  
81 index when the worms were starved (Mann-Whitney U-test,  $n_1=38$ ,  $n_2=40$ ,  $U=681$ , n.  
82 s.) or fed (Mann-Whitney U-test, inclination down:  $n_1=20$ ,  $n_2=35$ ,  $U=300$ , n. s.) (Figure  
83 3B). The 95% confidence intervals for our experiments did not encompass the results  
84 Vidal-Gadea and colleagues obtained for the respective groups (see Supplementary

85 File 1). Moreover, in the absence of a magnetic stimulus we found that the  
86 distribution of starved and fed worms was similar (Figure 1 - figure supplement 1).

87

### 88 **Horizontal Plate Assay**

89 In their second behavioural assay, Vidal-Gadea placed  $\approx 50$  worms in the center of an  
90 agar plate (Figure 3C). This plate was placed within a single wrapped Merritt coil  
91 system which permitted the generation of either null or horizontal magnetic fields of  
92 Earth strength intensity (either  $32.5\mu\text{T}$  or  $65\mu\text{T}$ ). They reported that in the absence of  
93 magnetic stimuli worms displayed no directional preference, whereas in the presence  
94 of a horizontal field fed worms distributed in a biased direction  $120^\circ$  from North. We  
95 replicated these experiments, treating each plate as an experimental unit. Blind  
96 analysis of worm orientation revealed no effect on orientation behavior when  
97 applying a  $32.5\mu\text{T}$  stimulus (Rayleigh-test,  $r=0.20$ ,  $n=24$ , n.s.) or a  $65\mu\text{T}$  stimulus  
98 (Rayleigh-test,  $r=0.25$ ,  $n=24$ , n. s., Figure 3D). Nor did we observe any directional  
99 preference in our control experiments ( $32.5\mu\text{T}$ : Rayleigh-test,  $r=0.10$ ,  $n=24$ , n. s.;  
100  $65\mu\text{T}$ : Rayleigh-test,  $r=0.11$ ,  $n=24$ ).

101

### 102 **Magnetotaxis Assay**

103 In their third behavior assay worms were placed in the center of a horizontal agar  
104 plate between two different goal areas (Figure 3E). An extremely strong neodymium  
105 magnet generating a field up to  $0.29\text{T}$  (approximately 8,000 times Earth strength),  
106 was placed beneath one of the goal areas. Vidal-Gadea reported that in the absence  
107 of this magnet worms were distributed evenly between the goal areas, however, if  
108 the magnet was present worms migrated towards it. We replicated their set up  
109 placing a strong neodymium magnet under one goal area, but added an equally size  
110 non-magnetic brass control under the opposing goal area. We observed no  
111 preference for the goal area associated with the neodymium magnet ( $n=49$  plates,  
112 Wilcoxon signed rank test,  $V=565$ , n.s., Figure 3F). The confidence interval did not

113 include the results reported by Vidal-Gadea and colleagues (95%CI: -0.138 to 0.128).  
114 As false-positives in magnetoreception have been associated with contamination of  
115 biological material with exogenous iron we asked whether this might influence the  
116 behavior of worms (Edelman et al., 2015). We tested this by growing worms on agar  
117 plates spiked with magnetite particles, and repeated the magnetotaxis assay. We  
118 found a weak but significant preference for the goal area under which the magnet  
119 resided (Wilcoxon signed rank test, n=49 plates, V=670.5, p=0.042, Figure 3F).

120

## 121 **Discussion**

122 Why are our results different from those of Vidal-Gadea? We have gone to great  
123 lengths to employ the same protocols. We have used worms from the same source,  
124 we have employed the same neodymium magnets, we have used the same assay  
125 plates, and the same synchronization and starvation protocols. There were, however,  
126 a number of important differences. First, we have used double wrapped coils for our  
127 experiments (Kirschvink, 1992). Our double wrapped coils (unlike single wrapped  
128 coils) allow the application of a magnetic stimulus without generating a change in  
129 temperature compared to the control condition. Heat is an issue when dealing with *C.*  
130 *elegans* as it is known that they can reliably detect temperature changes that are  
131  $<0.1^{\circ}\text{C}$  (Ramot et al., 2008). Second, we used strict blinding procedures in all our  
132 assays, assuring an unbiased assessment of the worm responses. While Vidal-  
133 Gadea report blinding when comparing different genotypes, they do not report  
134 blinding to the magnetic condition. Third, we have applied the appropriate statistical  
135 methodology when analysing our data from the horizontal plate assay. Vidal-Gadea  
136 placed  $\approx 50$  worms on a plate treating each worm as a biological replicate. However,  
137 as worms tested on the same plate can interact with each other, they are not true  
138 independent biological replicates. The approach adopted by Vidale-Gadea is known  
139 as pseudoreplication, as it confuses the number of data points with the number of

140 independent samples, increasing the probability of rejecting the null hypothesis whilst  
141 it is actually true (Lazic, 2010).

142

143 Moreover, there are a number of conceptual issues that undermine the assertion that  
144 *C. elegans* are magnetosensitive. First, the magnetotaxis assay relies on a  
145 permanent magnet that generates a field that is up to 8000 times Earth strength  
146 (0.29T). At no time in its natural environment would *C.elegans* encounter such a  
147 strong field. An alternative explanation for this "magnetotactic behavior" could be that  
148 exogenous iron particles attached to, or ingested by the worm, might, in the presence  
149 of an extremely large magnetic field influence the direction of locomotion by applying  
150 a force to surface mechanoreceptors.

151

152 More troubling is the underlying hypothesis that nematodes adopt a correction angle  
153 ( $\alpha$ ) relative to the inclination of the field to guide their vertical movement. Imagine a  
154 nematode is located in Cairo where the inclination of the Earth's magnetic vector is  
155  $44^{\circ} 33'$ . To migrate vertically (i.e.  $90^{\circ}$ ) it should adopt a correction angle of  
156 approximately  $45^{\circ}$  to the magnetic vector and maintain that trajectory (Figure 4A).  
157 Assuming that nematodes cannot distinguish up from down, the adoption of a fixed  
158  $45^{\circ}$  angle from the inclination of the field is just as likely to result in horizontal  
159 movement ( $180^{\circ}$ ) as vertical translation ( $90^{\circ}$ ). This problem is exacerbated as the  
160 correction angle increases (e.g.  $60^{\circ}$ ) (Figure 4B). In the best case scenario worms  
161 could undertake random walks around a set angle ( $45^{\circ}$ ), that would result in a  
162 meandering descending trajectory, but with a large increase in path length. The  
163 concept proposed by Vidal-Gadea is only an efficient strategy if the worms are using  
164 the 'correction angle' in relation to an independent reference (i.e. gravity). However, if  
165 worms are able to distinguish up from down based on gravity, why would they rely on  
166 a magnetic field vector?

167

168 In conclusion, we were not able to replicate the findings of Vidal-Gadea and  
169 colleagues. We have made a number of arguments why this might be the case, but it  
170 is possible that our failure to replicate this work is due to a factor we are not aware of.  
171 However, it is pertinent to note that other attempts to elicit magnetoreceptive  
172 behavior in *C. elegans* have also been unsuccessful (Njus et al., 2015). Collectively,  
173 we conclude that *C. elegans* is not a suitable model system to understand the  
174 molecular basis of magnetoreception because (a) they lack a magnetic sense, or, (b)  
175 their magnetotactic behaviour is not robust.

176

177

## 178 **Methods and Materials**

### 179 **Animals**

180 Worms (N2 strain, received from Caenorhabditis Genetics Center) were maintained  
181 on the *Escherichia coli* strain OP50 as food. They were kept in incubators at constant  
182 dark conditions at 20°C in an unmanipulated earth-strength magnetic field (Vienna:  
183 field strength: 49 $\mu$ T, inclination: 64°). For all assays we used adult hermaphrodite  
184 worms that had not previously been starved. Worms were synchronized (bleached)  
185 before the tests to make sure animals of the same age were employed for  
186 behavioural analysis. Worms referred to as 'fed' were always tested within 10 mins of  
187 being removed from the culture plate. 'Starved' animals were kept in liquid Nematode  
188 Growth Media (NGM) for  $\approx$ 30min.

189

### 190 **Chemotaxis experiments**

191 For our chemotaxis experiments we used 100mm petri dishes filled with 3%  
192 chemotaxis agar as test plates. Employing a template we marked each of the test  
193 plates with one center release point (see Figure 3E) and two smaller 'scoring' circles  
194 (diameter: 3.5cm). Sodium azide (1.5 $\mu$ l of 1M) was applied to the center of each of  
195 the scoring circles to immobilize the worms (Nuttley et al., 2001). Worms were picked

196 from the culture plates and collected in a small drop of NGM on a parafilm strip. In  
197 order to reduce bacterial contamination we carefully removed liquid containing  
198 bacteria and replaced it with new NGM. Worms were pipetted onto the center of the  
199 assay plate and 1 $\mu$ l 1% benzaldehyde solution (in ethanol) was applied to one  
200 scoring circle and 1 $\mu$ l 100% ethanol was applied to the other scoring circle. The  
201 plates were covered with aluminum foil and placed in the shielded room and left  
202 undisturbed for one hour. For our pre-exposure experiments a strip of parafilm with a  
203 2 $\mu$ l drop of 100% benzaldehyde was placed on the upper inside lid of a plate. After  
204 90 minutes of pre-exposure the worms were tested as described above. For all  
205 chemotaxis experiments we tested  $\approx$ 50 worms per test. A preference index (PI) was  
206 calculated by ascertaining the difference between the number of worms reaching the  
207 benzaldehyde decision circle (B) and the 100% ethanol decision circle (E) and  
208 divided it by the total number of worms scored,  $PI=(B-E)/(B) + (E)$ .

209

### 210 **Magnetic coil set-up and magnetic shielding**

211 For earth-strength magnetic field manipulations we used a double wrapped custom  
212 built Helmholtz coil system (Serviciencia, S. L). The coils were located in the center  
213 of a 4.4m (long) x 2.9m (wide) x 2.3m (high) shielded room. The diameter of coils  
214 were as follows: 1200mm (Z-axis), 1254mm (Y-axis) and 1310mm (X-axis). The  
215 room was shielded against static magnetic fields by a 1mm thick layer of Mu-metal  
216 and against oscillating electromagnetic fields by an aluminum layer (5mm) (Magnetic  
217 Shielding). The 'Inclination down' setting as used in this study comprises a magnetic  
218 field vector with a 25 $\mu$ T horizontal component, -42  $\mu$ T vertical component and an  
219 inclination of -59.16°. The vertical component was inverted in the 'inclination up'  
220 treatment. Static magnetic fields were measured using a Three-axis Fluxgate  
221 Magnetometer (Bartington Instruments). Radio frequencies were measured using an  
222 EMI test receiver (Rhode & Schwarz: MNr: E01180) and an active shielded loop

223 antenna 6507 (EMCO: MNr: E0575). The receiver was put on MAXHOLD and  
224 measurements were taken for one minute.

225

### 226 **Burrowing assay**

227 We used 24cm long tubes filled with 3% chemotaxis agar (see Figure 3A), each end  
228 was closed with a plastic stopper. The tubes contained three small holes (3mm in  
229 diameter), one in the center and two 10cm apart from the center hole on either side.

230 During filling of the tubes great care was taken to avoid air bubbles at the ends of the  
231 tubes. Tubes with air bubbles were discarded. 1.5 $\mu$ l of 1M NaN<sub>3</sub> was added to each

232 end-hole of a test tube and  $\approx$ 50 were injected into the center-hole (Figure 3A). The

233 test tube was then covered with aluminum foil and placed upright in a holder. The

234 holder was placed in the shielded room inside a smaller copper Faraday cage

235 (Figure 2C). Tubes were left undisturbed overnight or alternatively over a day. At the

236 conclusion of the test the tubes were removed from the room and worms on either

237 side (3 cm from the end hole) were counted. The 'Inclination down' setting as used in

238 this study comprises a magnetic field vector with a 25 $\mu$ T horizontal component, -

239 42 $\mu$ T vertical component and an inclination of -59.16°. The vertical component was

240 inverted in the 'inclination up' treatment. These magnetic conditions were identical to

241 those employed by Vidal-Gadea. We calculated the burrowing index (BI) by dividing

242 the difference between worms on either side of the plastic tube (A), (B) by the total

243 number of scoring worms,  $BI=(A-B)/(A) + (B)$ .

244

### 245 **Horizontal plate assay**

246 Non-starved worms ( $\approx$ 50) were placed, with a droplet of NGM, on the center of a

247 100mm style petri dish filled with 3% chemotaxis agar. Sodium azide (0.1 M, 20 $\mu$ l)

248 was applied to the rim of the plate to immobilize the worms once they reached it.

249 Worms were released from the NGM droplet by removing the liquid with a tissue. The

250 plate was then immediately placed in the center of the magnetic coils, described

251 above, and covered with aluminum foil. Animals were tested in one of four magnetic  
252 directions (magnetic north pointing towards topographic north, east, south or west),  
253 with a field strength of 32.5 $\mu$ T and 65 $\mu$ T (close to the strength of the horizontal  
254 component of the Earth's magnetic field). In addition, we used two control conditions  
255 where the double wrapped coils were switched to antiparallel currents, which  
256 resulted in a zero magnetic field. We performed this control for the 32.5 $\mu$ T and 65 $\mu$ T  
257 field settings. Worms were allowed to move freely on the plate for one hour, then the  
258 position and the direction of each worm relative to the center was recorded. Magnetic  
259 field conditions were set by a person not involved in the analysis. Treatments and  
260 field conditions were revealed after all worms were counted and the angles  
261 measured.

262

### 263 **Magneto-taxis assay**

264 We used 100mm style petri dishes filled with 3% chemotaxis agar as test plates,  
265 marked with one center release point and two smaller 'scoring' circles. Sodium azide  
266 (1.5 $\mu$ l of 1M) was applied to the center of each of the scoring circles to immobilize  
267 the worms. We randomly placed a magnet (N42 Neodymium 3.5-cm diameter  
268 magnet 5 mm thick and nickel-plated) under one goal area, and a brass coin with  
269 identical dimensions as a control under the opposing goal area. The magnet was  
270 placed with the magnetic north pole pointing up in all tests.  $\approx$ 50 worms were placed  
271 in the central release point with a droplet of NGM. After the worms were released by  
272 removing the liquid the plate was covered quickly with aluminum foil and placed in  
273 the shielded room. After one hour the number of worms in each goal area were  
274 counted blind. It should be noted that Vidal-Gadea performed this experiment over  
275 30mins, however, our pilot experiments showed that a longer time resulted in a  
276 higher percentage of worms in the goal areas. For our iron contamination  
277 experiments the OP50 (in solution) was mixed thoroughly with magnetite to create a  
278 1% magnetite/OP50 solution. Worms were then synchronized and grown on OP50

279 covered plates until they reached adulthood. Experiments were performed as  
280 described above. In order to avoid cross-contamination separate picks were used for  
281 the magnetite and non-magnetite trials. To calculate the preference index (PI) the  
282 number of worms on the magnetic side (M) were subtracted by the number of worms  
283 on the control side (C) and then divided by the total number of scoring worms,  $PI =$   
284  $(M - C) / (M + C)$ .

285

## 286 **Statistics**

287 In all tests the experimenter was blind to the particular treatment when counting the  
288 worms. In general, we counted all tests, and did not discount tests based on low  
289 numbers of scoring worms or similar criteria in order to have an unbiased result.  
290 However, in the rare cases where no worms scored, the tests were excluded from  
291 further analysis. A one-tailed Wilcoxon one-sample test was used to test if worms  
292 preferred the benzaldehyde and the magnet. For the burrowing assay we used a  
293 two-tailed Wilcoxon one-sample test to ascertain if worms burrowing preference  
294 differed from zero. In order to compare groups we used a Mann–Whitney U test. All  
295 linear statistical tests were performed in R (R Development Core Team, 2012). The  
296 circular data from the horizontal plate assay were analyzed using Oriana 4. Worms  
297 tested together at the same time on the same plate can interact with each other and  
298 hence constitute non-independent samples. Therefore, we calculated one mean  
299 orientation vector for each test plate, by calculating the vector sum of all worms from  
300 this plate. The directions from the plates, relative to the magnetic field and a  
301 geographically fixed direction (door to the shielded room), were then tested for a  
302 significant unimodal orientation using the Rayleigh test. Full statistics are shown in  
303 Supplementary File 1.

304

## 305 **Acknowledgements**

306 We wish to thank Boehringer Ingelheim for funding basic research at the Institute for  
307 Molecular Pathology. We also wish to acknowledge the IMP graphics department  
308 and the media kitchen. We are indebted to Manuel Zimmer, Annika Nichols and  
309 Harris Kaplan for their assistance with the experiments described in this manuscript.  
310 We thank Andres Vidal-Gadea for hosting Lukas Lander for a week in his laboratory,  
311 and showing him how to perform the magnetic behavioral protocols. The *C. elegans*  
312 strain was provided by the CGC which is funded by NIH Office of Research  
313 Infrastructure Programs (P40 OD 010440).

314

### 315 **References**

- 316 Bainbridge, C., Schuler, A., and Vidal-Gadea, A. (2016). Method for the assessment  
317 of neuromuscular integrity and burrowing choice in vermiform animals. *J*  
318 *Neurosci Methods*.
- 319 Edelman, N.B., Fritz, T., Nimpf, S., Pichler, P., Lauwers, M., Hickman, R.W.,  
320 Papadaki-Anastasopoulou, A., Ushakova, L., Heuser, T., Resch, G.P., *et al.* (2015).  
321 No evidence for intracellular magnetite in putative vertebrate magnetoreceptors  
322 identified by magnetic screening. *Proc Natl Acad Sci* *112*, 262-267.
- 323 Engels, S., Schneider, N.-L., Lefeldt, N., Hein, C.M., Zapka, M., Michalik, A., Elbers,  
324 D., Kittel, A., Hore, P., and Mouritsen, H. (2014). Anthropogenic electromagnetic  
325 noise disrupts magnetic compass orientation in a migratory bird. *Nature* *509*,  
326 353-356.
- 327 Keeton, W.T. (1971). Magnets interfere with pigeon homing. *Proceedings of the*  
328 *National Academy of Sciences of the United States of America* *68*, 102-106.
- 329 Kirschvink, J.L. (1992). Uniform magnetic fields and double-wrapped coil  
330 systems: improved techniques for the design of bioelectromagnetic experiments.  
331 *Bioelectromagnetics* *13*, 401-411.
- 332 Lazic, S.E. (2010). The problem of pseudoreplication in neuroscientific studies: is  
333 it affecting your analysis? *BMC neuroscience* *11*, 5.
- 334 Lefeldt, N., Heyers, D., Schneider, N.L., Engels, S., Elbers, D., and Mouritsen, H.  
335 (2014). Magnetic field-driven induction of ZENK in the trigeminal system of  
336 pigeons (*Columba livia*). *Journal of the Royal Society, Interface* *11*, 20140777.
- 337 Lohmann, K.J., Lohmann, C.M., Ehrhart, L.M., Bagley, D.A., and Swing, T. (2004).  
338 Animal behaviour: geomagnetic map used in sea-turtle navigation. *Nature* *428*,  
339 909-910.
- 340 Mora, C.V., Davison, M., Wild, J.M., and Walker, M.M. (2004). Magnetoreception  
341 and its trigeminal mediation in the homing pigeon. *Nature* *432*, 508-511.
- 342 Nemeč, P., Altmann, J., Marhold, S., Burda, H., and Oelschlager, H.H. (2001).  
343 Neuroanatomy of magnetoreception: the superior colliculus involved in  
344 magnetic orientation in a mammal. *Science* *294*, 366-368.
- 345 Njus, Z., Feldmann, D., Brien, R., Kong, T., Kalwa, U., and Pandey, S. (2015).  
346 Characterizing the Effect of Static Magnetic Fields on *C. elegans* Using  
347 Microfluidics. *Advances in Bioscience and Biotechnology* *6*, 583.

348 Nuttley, W.M., Harbinder, S., and van der Kooy, D. (2001). Regulation of distinct  
349 attractive and aversive mechanisms mediating benzaldehyde chemotaxis in  
350 *Caenorhabditis elegans*. *Learn Mem* *8*, 170-181.

351 R Development Core Team (2012). R: A language and environment for statistical  
352 computing (Vienna, Austria: R Foundation for Statistical Computing).

353 Ramot, D., MacInnis, B.L., and Goodman, M.B. (2008). Bidirectional temperature-  
354 sensing by a single thermosensory neuron in *C. elegans*. *Nature neuroscience* *11*,  
355 908-915.

356 Vidal-Gadea, A., Ward, K., Beron, C., Ghorashian, N., Gokce, S., Russell, J., Truong,  
357 N., Parikh, A., Gadea, O., Ben-Yakar, A., *et al.* (2015). Magnetosensitive neurons  
358 mediate geomagnetic orientation in *Caenorhabditis elegans*. *eLife* *4*, e07493.

359 Wiltschko, R., and Wiltschko, W. (2012). Magnetoreception. In *Sensing in Nature*,  
360 C. López-Larrea, ed. (New York, NY: Springer US), pp. 126-141.

361 Zapka, M., Heyers, D., Hein, C.M., Engels, S., Schneider, N.L., Hans, J., Weiler, S.,  
362 Dreyer, D., Kishkinev, D., Wild, J.M., *et al.* (2009). Visual but not trigeminal  
363 mediation of magnetic compass information in a migratory bird. *Nature* *461*,  
364 1274-1277.

365

366

367

368 **Figure Legends**

369

370 **Figure 1. Benzaldehyde control experiment**

371 (A) Experiment set up for the benzaldehyde positive control experiments. Worms  
372 were placed at the release point and given a choice between 1% benzaldehyde in  
373 ethanol, or 100% ethanol. (B) Naïve worms preferentially orientated towards the  
374 benzaldehyde (n=11, P=0.002), and away from it if pre-exposed to benzaldehyde  
375 (n=12, P=0.036). Each data point represents the result of one independent test plate.

376

377 **Figure 2. Infrastructure for magnetic experiments.**

378 (A) All experiments were performed within a mu metal shielded room surrounded by  
379 a 5mm aluminum Faraday cage. DC power sources and the computer driving the  
380 Helmholtz coils were located outside this shielded room, and cables into the room  
381 were filtered for radio frequencies. (B) Graph showing the radio-frequencies present  
382 in the shielded room between 0.1 to 10 MHz are below 0.1 nT, indicative of very low  
383 levels of radio frequency contamination. (C) Experimental setup for exposure of  
384 worms to magnetic fields. Three pairs of double-wrapped Helmholtz coils surround a  
385 plastic stage in the center. Worms were placed on this stage for the vertical  
386 burrowing, horizontal plate, and magnetotaxis assays. In the burrowing assay we  
387 surrounded the tubes by an additional small Faraday cage.

388

389 **Figure 3. Magnetic assays and results**

390 (A) Diagram showing the tubes employed for the vertical burrowing assay. Worms  
391 were injected in the center hole, and  $\text{NaN}_3$  in the end-holes to immobilize them. Fed  
392 or starved worms were allowed to burrow overnight with the inclination of the  
393 magnetic field either up ( $59.16^\circ$ ) or down ( $-59.16^\circ$ ). At the conclusion of the test the  
394 worms on either side (3 cm from the end hole) were counted and a preference index  
395 calculated. (B) Results for the vertical burrowing assay. We observed no significant

396 difference in the burrowing index when the inclination of the magnetic field was  
397 inverted, whether the worms were fed or starved. (C) Set up for the horizontal plate  
398 assay. Worms were released in the center of the plate and allowed to move freely for  
399 one hour before the position and the direction of each worm relative to the center  
400 was recorded. Animals were tested in one of four magnetic directions (magnetic  
401 north pointing towards either topographic north, east, south and west), with a field  
402 strength of 32.5 $\mu$ T and 65 $\mu$ T. Control experiments employed antiparallel currents  
403 resulting in a zero magnetic field. We calculated one mean orientation vector for  
404 each test plate, by calculating the vector sum of all worms from this plate. (D) Results  
405 for the horizontal plate assay. We observed no directional preference when worms  
406 were exposed to either 32.5  $\mu$ T or 65  $\mu$ T magnetic stimuli. Each dot represents the  
407 mean worm direction for one plate, while the black arrow showing the direction and  
408 length ( $r$ ) of the mean vector (radius of the circle is 1). Mag N indicates the  
409 normalized magnetic north and Topo N the topographic north. (E) Set up for the  
410 magneto-taxis assay. Worms were released in the center of a testing plate and could  
411 choose between two 3.5 cm diameter circles (goal areas) with a strong magnet  
412 (0.29T) or a brass control underneath. Worms in each of the goal areas were  
413 counted and a preference index calculated. (F) We observed no preference for the  
414 area above the magnet, unless worms were fed bacteria contaminated with  
415 magnetite particles ( $P=0.042$ ,  $n=49$  plates). Error bars show standard error of the  
416 means.

417

418 **Figure 4. Conceptual issues with the Vidal-Gadea hypothesis.**

419 (A) The hypothesis advanced by Vidal-Gadea and colleagues argues that  
420 nematodes exploit the inclination of the Earth's magnetic field to guide vertical  
421 movement. They propose that nematodes adopt a correction angle ( $\alpha$ , e.g. 45°)  
422 relative to the inclination of the field, which varies depending on the latitude. However,  
423 if the worms adopt such an angle and take a fixed trajectory this is as likely to result

424 in a worm that travels horizontally as vertically. (B) As the latitude nears the equator  
425 the correction angle increases (e.g. 60°), and consequently a worm is just as likely to  
426 translate downwards, or at an oblique angle towards the Earth's surface. The light  
427 blue lines show the magnetic field vector.

428

429 **Supplementary File 1**

430 Detailed summary of statistics used for the chemotaxis as well as the magnetic  
431 assays.

432

433 **Figure 1 - figure supplement 1**

434 Results of the burrowing assay performed on fed and starved worms in the absence  
435 of a magnetic field. The distribution of starved and fed worms is similar.

436

437
